# Supplementary material for: Synthesis of mono(guanidinate) rare earth metal bis(amide) complexes and their performance in the ring-opening polymerization of l-lactide and rac-lactide
Source: Royal Society of Chemistry journal article supplement (doi:10.1039/c2nj20925j), 2012-01-01
Supplement: c2nj20925j.pdf [file c2nj20925j.pdf]

## Supporting Information for

### Synthesis of mono(guanidinate) rare earth metal bis(amide) complexes and their performance for the ring-opening polymerization of L-lactide and *rac*-lactide

Yibin Wang,<sup>a,b</sup> Yunjie Luo,<sup>\*,a</sup> Jue Chen,<sup>a</sup> Hanming Xue,<sup>a</sup> Hongze Liang<sup>b</sup>

<sup>a</sup> *Organometallic Chemistry Laboratory, Ningbo Institute of Technology, Zhejiang University, Ningbo 315100, P. R. China*

<sup>b</sup> *School of Materials Science & Chemical Engineering, Ningbo University, Ningbo, Zhejiang 315211, P. R. China*

Corresponding author: E-mail: [lyj@nit.zju.edu.cn](mailto:lyj@nit.zju.edu.cn)

Tel: +86-574-88130085

Fax: +86-574-88130130

**Fig. S1** <sup>1</sup>H NMR spectrum of **4**

**Fig. S2** Plot of the degree of LA polymerization (i.e., number of repeat units) vs [L-LA]/[**4**] at 50 °C in toluene.

**Fig. S3** <sup>1</sup>H NMR spectrum (400 MHz, CDCl<sub>3</sub>) of L-lactide oligomer using **4**/<sup>i</sup>PrOH as an initiator after quenching with ethanol

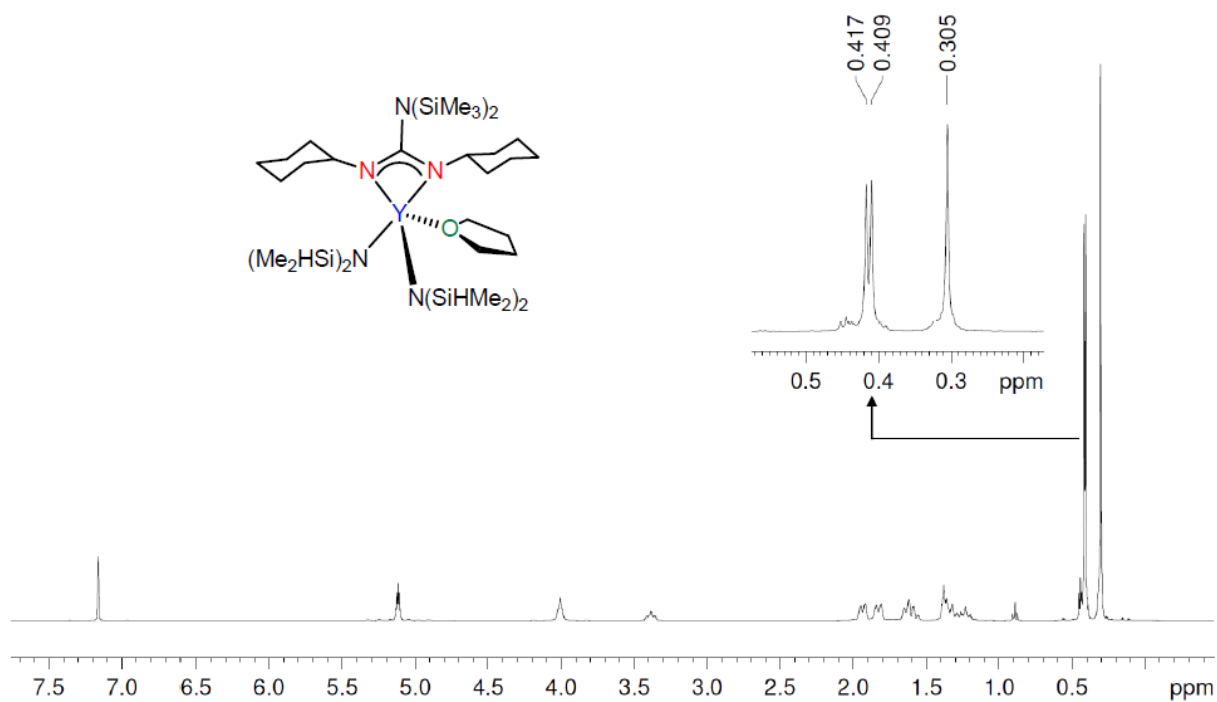

**Fig. S1** <sup>1</sup>H NMR spectrum of 4

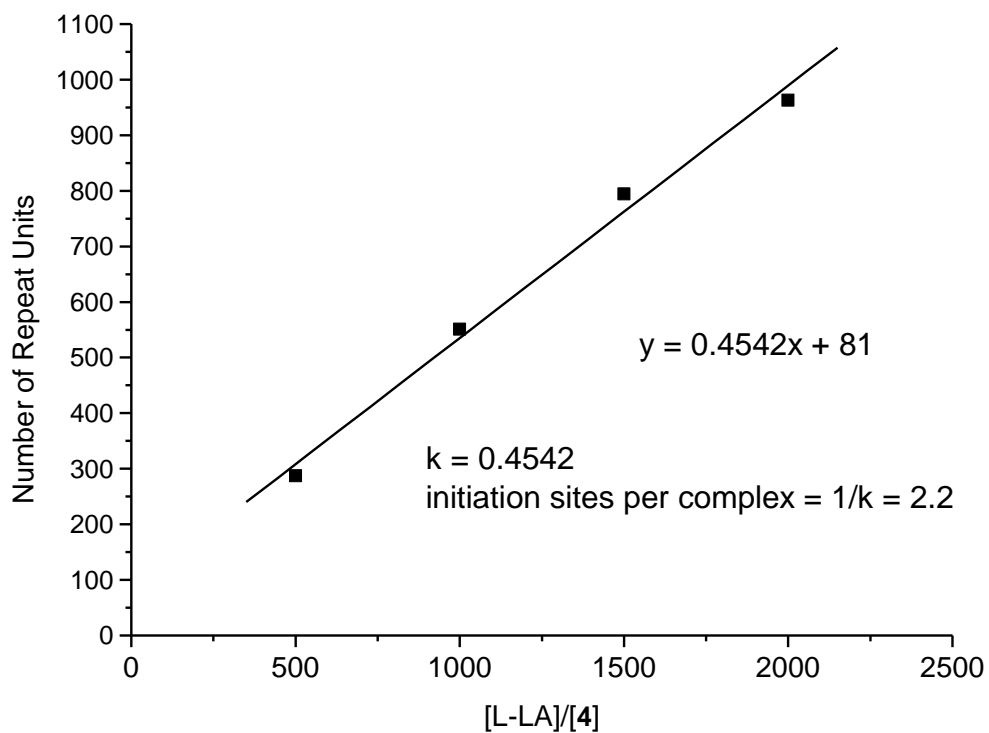

**Fig. S2.** Plot of the degree of LA polymerization (i.e., number of repeat units) vs [L-LA]/[4] at 50 °C in toluene. Initiation sites per complex = 2.2, showing that both amido groups initiated the polymerization

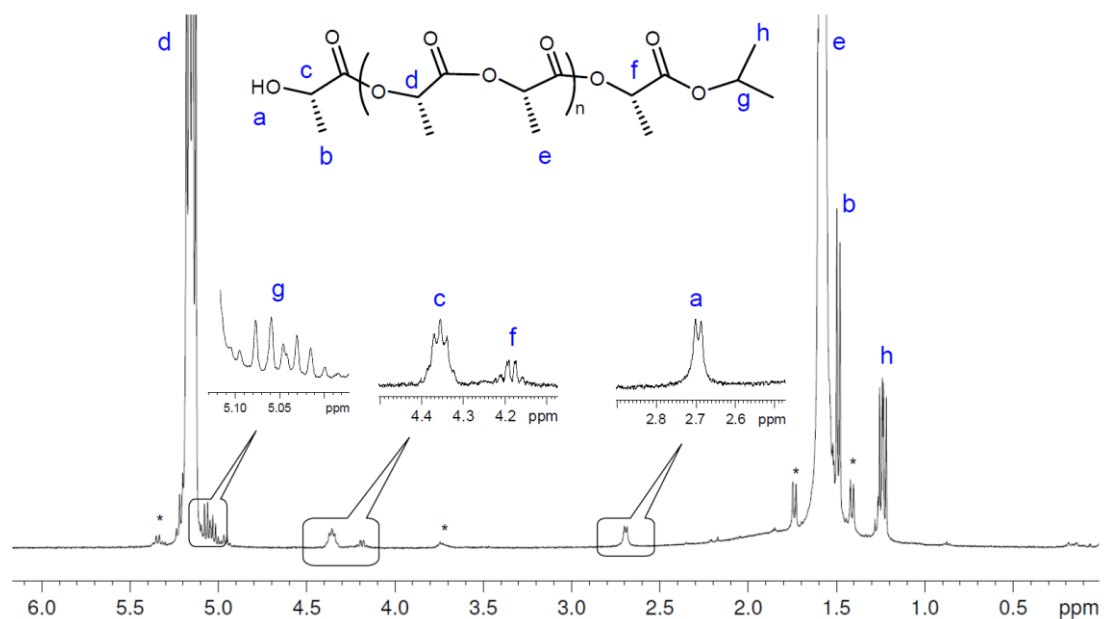

**Fig. S3** <sup>1</sup>H NMR spectrum (400 MHz, CDCl<sub>3</sub>) of L-lactide oligomer using 4<sup>i</sup>PrOH as an initiator after quenching with ethanol (\*, ethanol and monomer signals). Polymerization conditions: [Y]<sub>0</sub>/[<sup>i</sup>PrOH]<sub>0</sub>/[LA]<sub>0</sub> = 1 : 2 : 10, in toluene, 12 min, 20 °C.
